# Supplementary material for: The effect of water storage change in ET estimation in humid catchments based on Budyko framework and water balance models
Source: Copernicus journal article supplement (doi:10.5194/hess-2017-151), 2017-04-05
Supplement: Supplementary file 1 [file Supporting Figure.docx]

**The effect of water storage change in *ET* estimation in humid catchments based on Budyko framework and water balance models**

Tingting Wang1,2, Fubao Sun1,2,3*, Hong Wang1, Wenbin Liu1, Hao Wang4

# Supporting Figure





Figure S1 The count of catchments grouped by R2 between annual P and observed Q with linearly regression.
