# Supplementary material for: The effect of water storage change in ET estimation in humid catchments based on Budyko framework and water balance models
Source: Copernicus journal article supplement (doi:10.5194/hess-2017-151), 2017-04-05
Supplement: Supplementary file [file Supporting Figure.pdf › Response #1/Supporting Figure.pdf]

1    **The effect of water storage change in annual evapotranspiration**  
2    **estimation in humid catchments based on the Budyko framework**

3

4    Tingting Wang<sup>1,2</sup>, Fubao Sun<sup>1,2,3\*</sup>, Hong Wang<sup>1</sup>, Wenbin Liu<sup>1</sup>, Hao Wang<sup>4</sup>

5

6    **Supporting Figure**

7

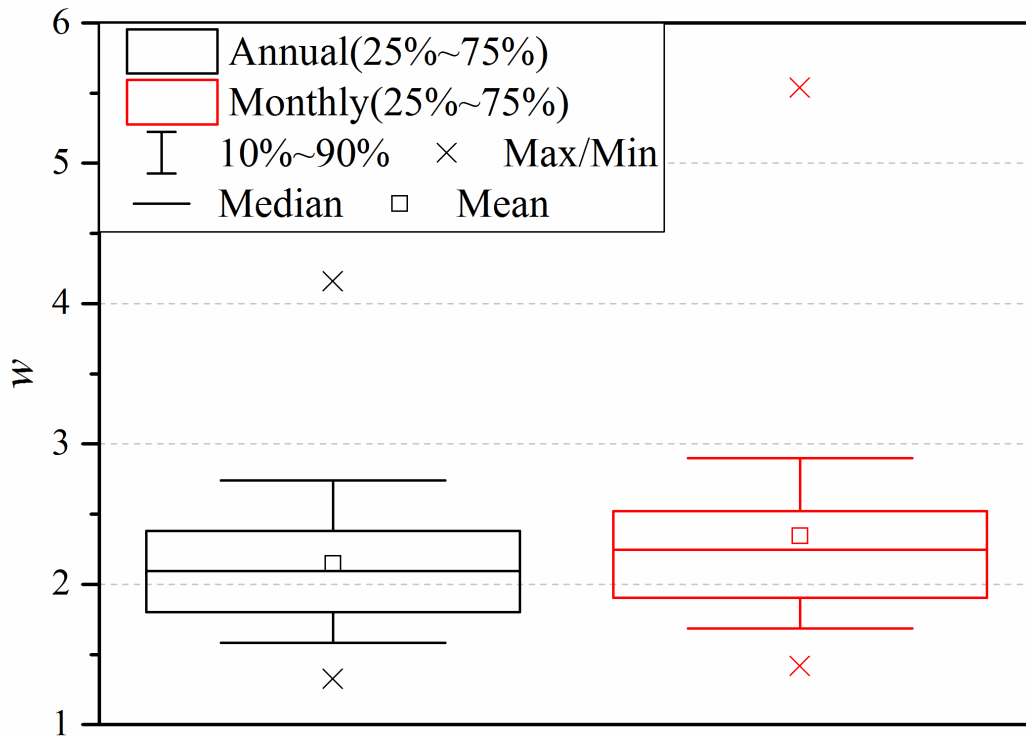

8

9    Figure S1 The boxplot of calibrated  $w$  in Fu's equation (black), and based on extended

10    Budyko equation (red).

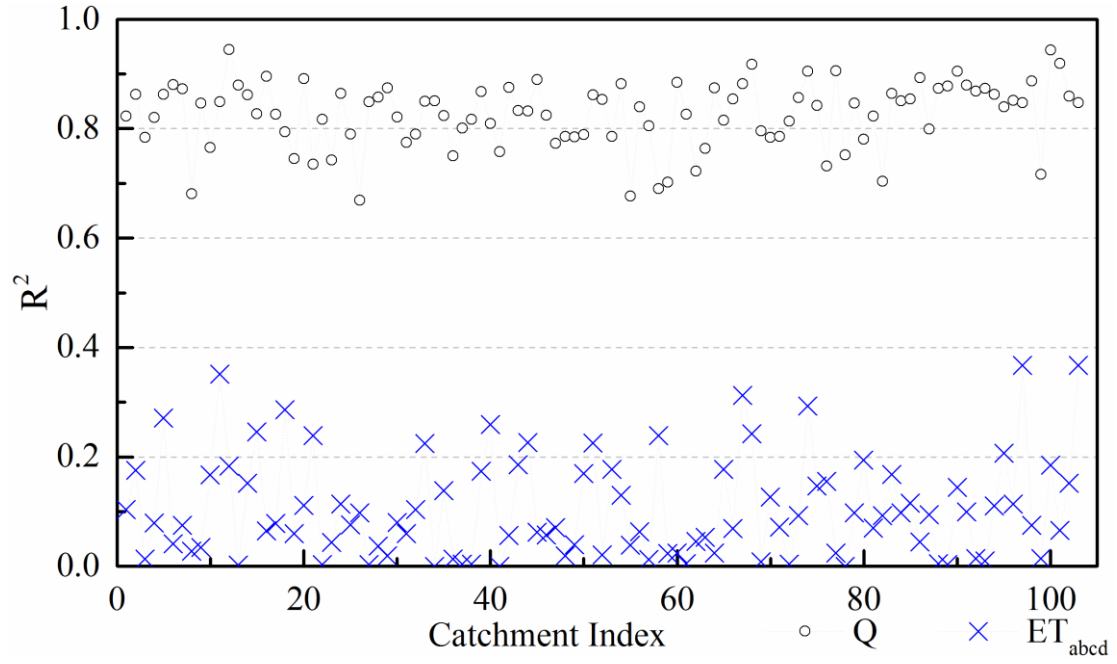

Figure S2 The  $R^2$  between observed and simulated results from abcd model, i.e.,  $Q_{obs}$  v.s.  $Q_{abcd}$  and  $ET_{wb}$  v.s.  $ET_{abcd}$  in 102 humid catchments over China.

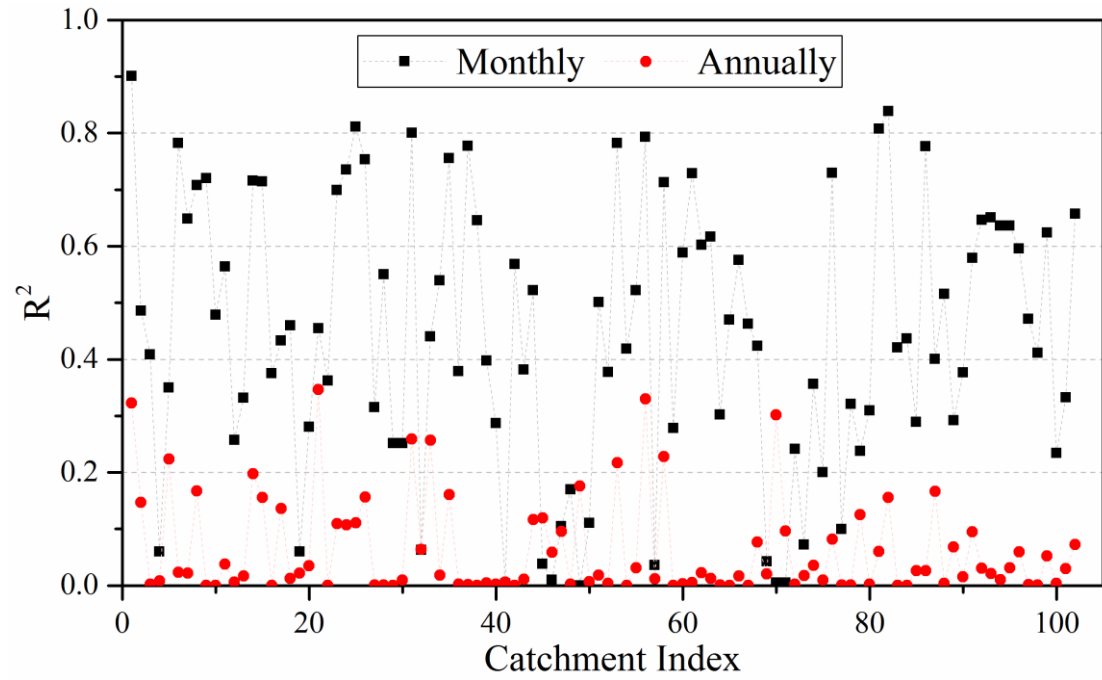

Figure S3 The  $R^2$  between monthly  $ET_{wb}$  and  $ET_{Budyko}$ , which is estimated using extended Budyko equation, and that aggregated to annual timescale, the  $\Delta S$  is the soil

19 moisture change from VIC output.

20

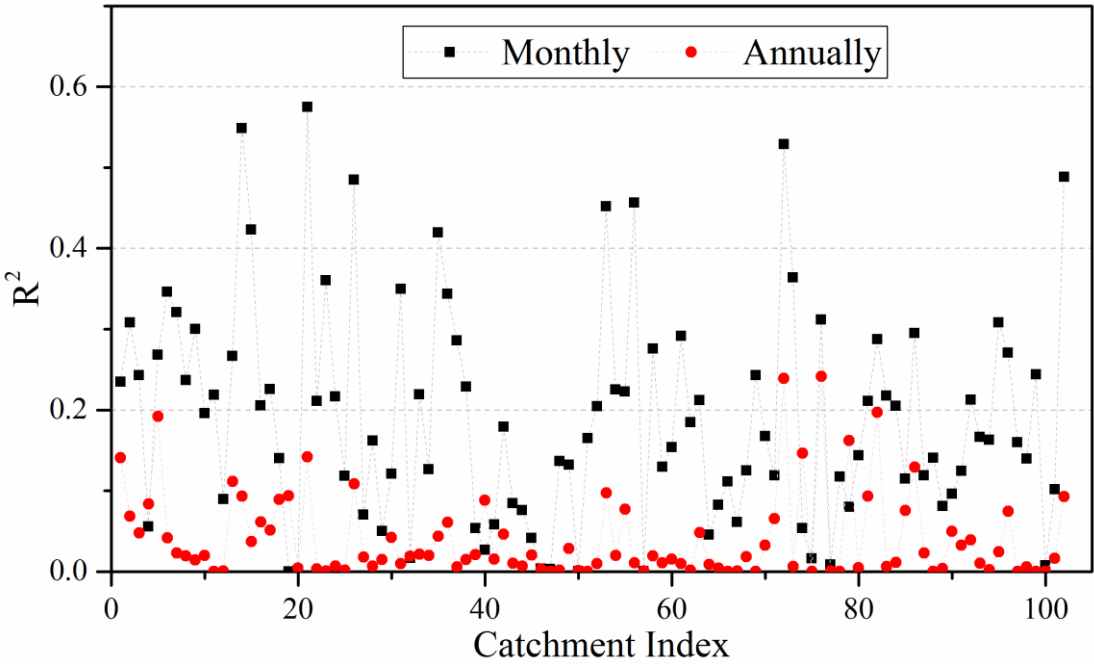

21

22 Figure S4 The  $R^2$  between monthly  $ET_{wb}$  and  $ET_{Budyko}$ , which is estimated using  
23 extended Budyko equation, and that aggregated to annual timescale, the  $\Delta S$  is the soil  
24 moisture change from GLDAS output.

25

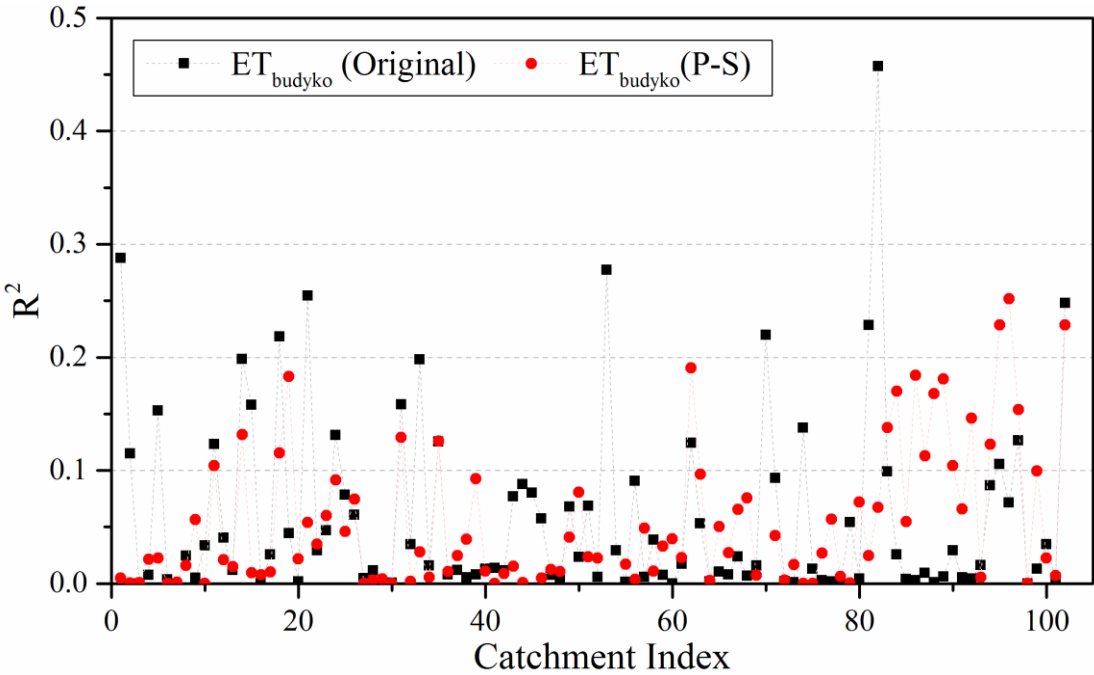

26

27 Figure S5 The  $R^2$  between annual  $ET_{wb}$  and  $ET_{Budyko}$  (black, marked as original), and

28 the corresponding results using annual  $P-\Delta S$  as equivalent  $P$  in Fu's equation (red,  
 29 marked as  $P-S$ ), the  $\Delta S$  is the abcd output.

30

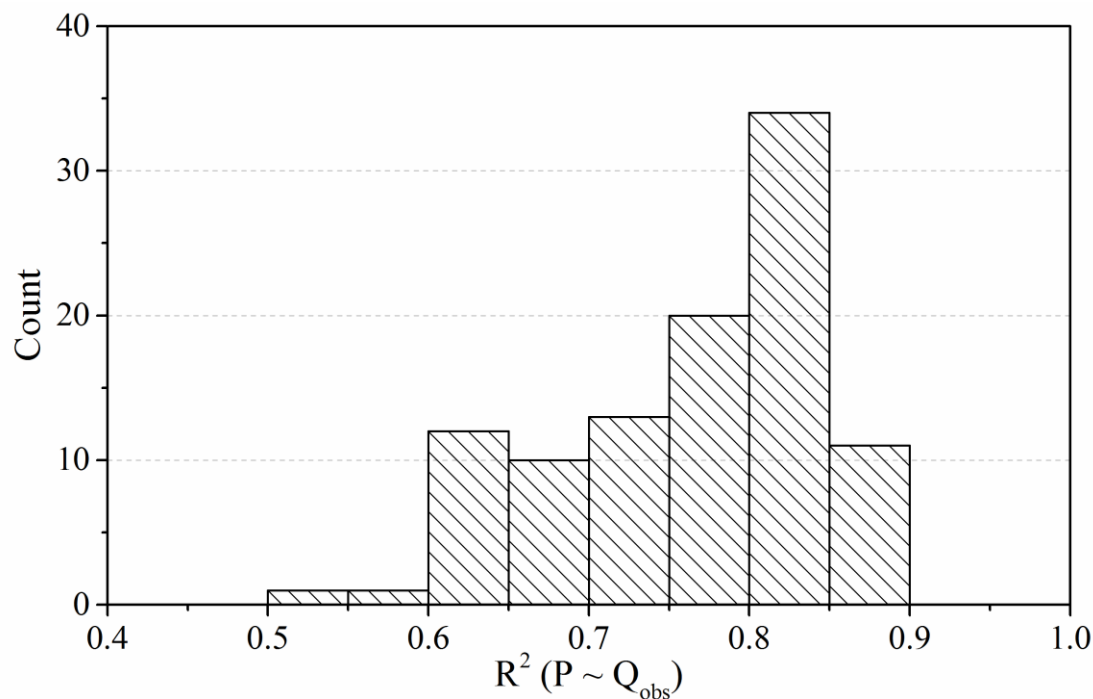

31

32 Figure S6 The statistical information of catchments grouped by  $R^2$  between annual  $P$   
 33 and  $Q_{obs}$  with linearly regression.

34
